# Supplementary material for: Validation of a holistic composite outcome measure for the evaluation of chronic pain interventions
Source: PubMed Central journal article supplement — Pain Rep. 2024 Oct 14;9(6):e1202. doi: 10.1097/PR9.0000000000001202 (PMC11473062; doi:10.1097/pr9.0000000000001202), 2024-10-14
Supplement: painreports-9-e1202-s001.pdf [file painreports-9-e1202-s001.pdf]

## SUPPLEMENTARY MATERIAL 1

### Sensitivity analysis: Equally weighted Holistic MCID score

#### *Internal Consistency: Multivariate Dimensional Analysis of equally weighted Holistic MCID*

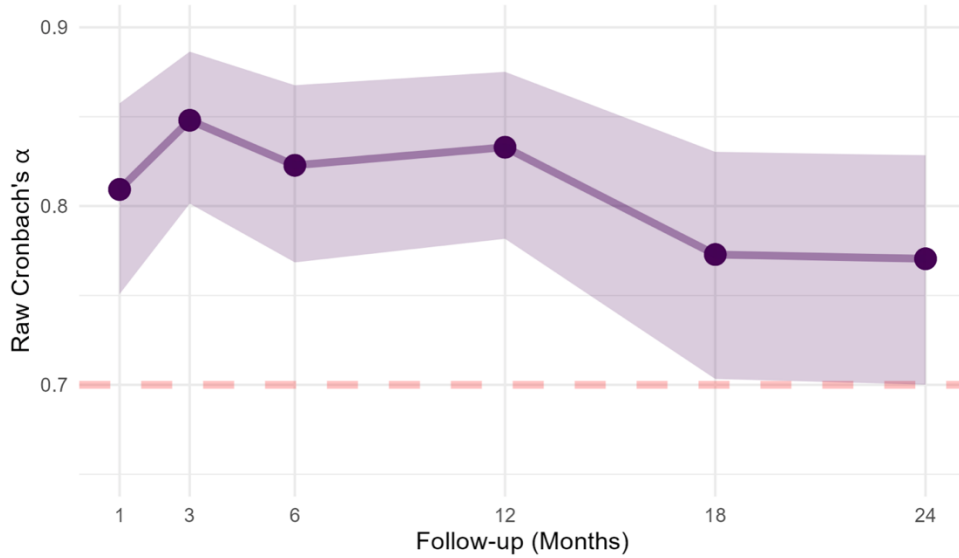

Figure S1. Internal consistency of equally weighted Holistic MCID at each follow-up

#### *Construct Validity: equally weighted Holistic MCID Association with PGIC*

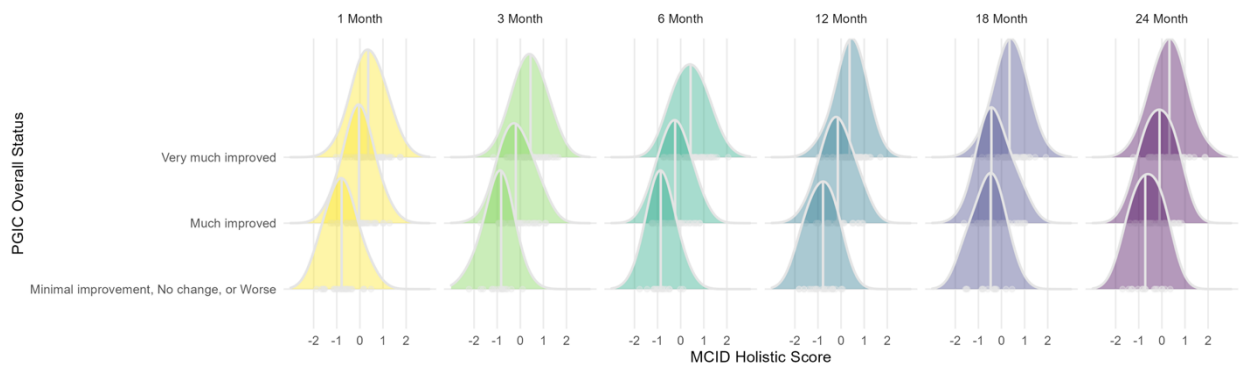

Figure S2. Association between equally weighted Holistic MCID score and PGIC

Table S1. Eigenvalues and Variance Explained by PCA dimensions (equally weighted Holistic MCID)

| Dimension   | Eigenvalue | Variance Percent | Cumulative Variance Percent |
|-------------|------------|------------------|-----------------------------|
| Dimension 1 | 2.98       | 59.65            | 59.65                       |
| Dimension 2 | 0.70       | 14.11            | 73.76                       |
| Dimension 3 | 0.58       | 11.67            | 85.43                       |
| Dimension 4 | 0.43       | 8.56             | 93.99                       |
| Dimension 5 | 0.30       | 6.01             | 100.00                      |

Table S2. Comparison of intervention response on the equally weighted Holistic MCID score versus the PGIC scale

| Coefficient                                              | Odds Ratio    | 95% CI             | <i>p</i> -value      |
|----------------------------------------------------------|---------------|--------------------|----------------------|
| Minimal improvement, No change, or Worse ⇒ Much improved | 0.042         | (0.02, 0.09)       | < 0.001***           |
| Much improved ⇒ Very much improved                       | 2.032         | (1.05, 3.93)       | 0.035*               |
| Visit - 3 Month                                          | 1.868         | (0.95, 3.66)       | 0.068 .              |
| Visit - 6 Month                                          | 2.039         | (1.03, 4.04)       | 0.041*               |
| Visit - 12 Month                                         | 1.458         | (0.73, 2.91)       | 0.284                |
| Visit - 18 Month                                         | 1.415         | (0.71, 2.84)       | 0.327                |
| Visit - 24 Month                                         | 1.306         | (0.65, 2.63)       | 0.457                |
| <b>Holistic Standardized MCID Score</b>                  | <b>25.293</b> | <b>(14, 45.74)</b> | <b>&lt; 0.001***</b> |

(\*\*\*) < 0.001, (\*\*) < 0.01, (\*) < 0.05, (.) < 0.1

### Construct Validity: equally weighted Holistic MCID Association with EQ-VAS

Table S3. Comparison of intervention response on the equally weighted Holistic MCID score versus the EQ-VAS

100% Response-inflated Mixed-effect Beta Regression (Inverted Scale)

Evidence of Significant Association between **HMCID** & EQ5D VAS (0-100)

| Coefficient                | Odds Ratio   | 95% CI              | p-value              |
|----------------------------|--------------|---------------------|----------------------|
| (Intercept)                | <b>0.330</b> | (0.3, 0.36)         | < 0.001***           |
| visit3 Month               | 0.937        | (0.87, 1.01)        | 0.099 .              |
| visit6 Month               | 0.909        | (0.84, 0.98)        | 0.016*               |
| visit12 Month              | 1.058        | (0.98, 1.14)        | 0.152                |
| visit18 Month              | 1.016        | (0.94, 1.1)         | 0.702                |
| visit24 Month              | 1.079        | (1, 1.17)           | 0.062 .              |
| <b>Holistic MCID Score</b> | <b>0.486</b> | <b>(0.46, 0.52)</b> | <b>&lt; 0.001***</b> |

(\*\*\*) < 0.001, (\*\*) < 0.01, (\*) < 0.05, (.) < 0.1

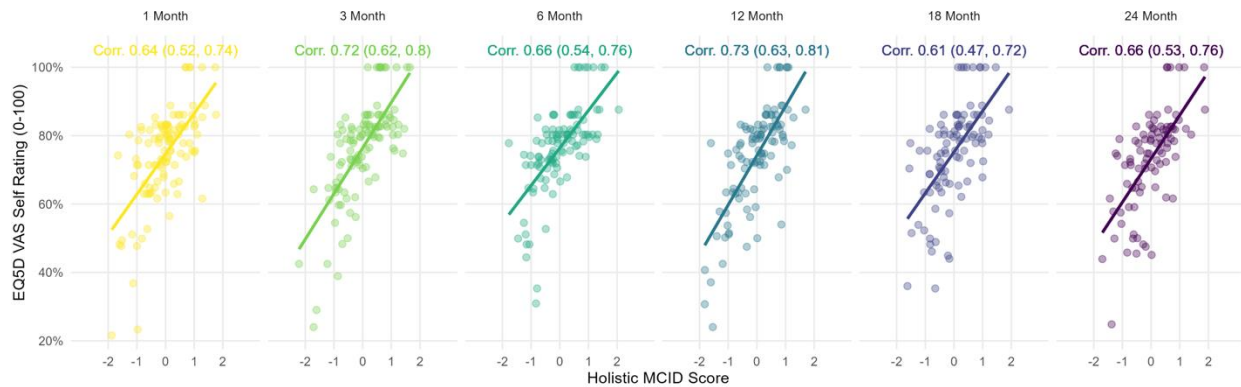

Figure S3. Association between equally weighted Holistic MCID score and EQ-VAS

## SUPPLEMENTARY MATERIAL 2

### Sensitivity analysis: VAS MCID alone

#### VAS MCID Association with PGIC

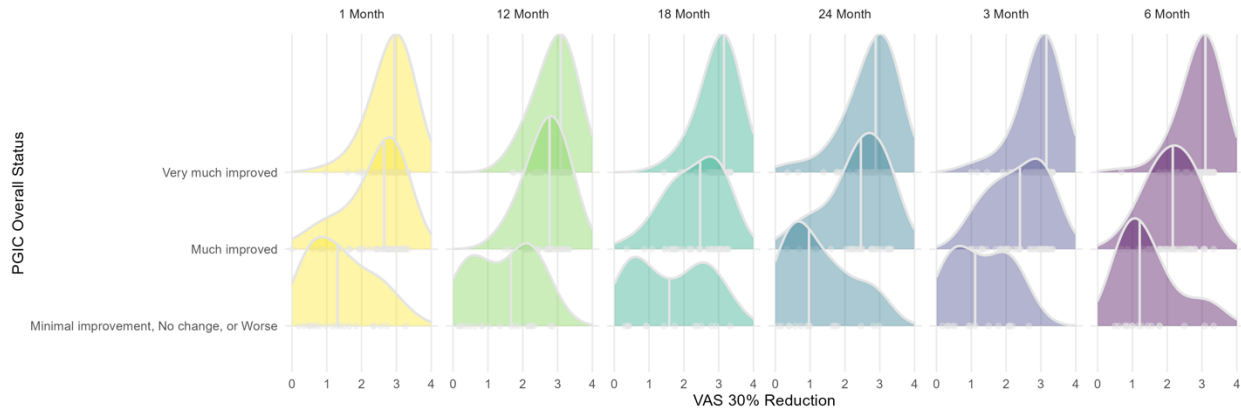

Figure S4. Association between VAS MCID score and PGIC

Table S4. Comparison of intervention response on the VAS MCID score versus the PGIC scale

| Coefficient                                              | Odds Ratio   | 95% CI              | <i>p</i> -value      |
|----------------------------------------------------------|--------------|---------------------|----------------------|
| Minimal improvement, No change, or Worse ⇒ Much improved | 0.051        | (0.03, 0.1)         | < 0.001***           |
| Much improved ⇒ Very much improved                       | 1.833        | (1, 3.35)           | 0.049*               |
| Visit - 3 Month                                          | 1.445        | (0.76, 2.75)        | 0.263                |
| Visit - 6 Month                                          | 1.490        | (0.78, 2.85)        | 0.229                |
| Visit - 12 Month                                         | 0.982        | (0.51, 1.9)         | 0.956                |
| Visit - 18 Month                                         | 0.989        | (0.51, 1.92)        | 0.973                |
| Visit - 24 Month                                         | 1.387        | (0.7, 2.75)         | 0.351                |
| <b>VAS 30% Reduction</b>                                 | <b>6.735</b> | <b>(4.71, 9.62)</b> | <b>&lt; 0.001***</b> |

(\*\*\*) < 0.001, (\*\*) < 0.01, (\*) < 0.05, (.) < 0.1

## VAS MCID Association with EQ-VAS

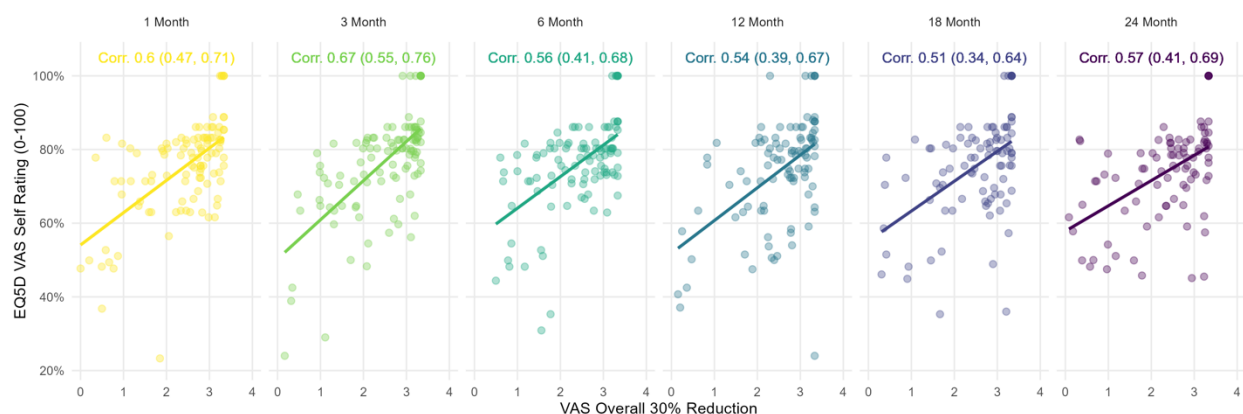

Figure S5. Association between VAS MCID score and EQ-VAS

Table S5. Comparison of intervention response on VAS MCID versus EQ-VAS

100% Response-inflated Mixed-effect Beta Regression (Inverted Scale)

Evidence of Significant Association between **VAS** & EQ5D VAS (0-100)

| Coefficient              | Odds Ratio   | 95% CI             | p-value              |
|--------------------------|--------------|--------------------|----------------------|
| (Intercept)              | 0.708        | (0.61, 0.82)       | < 0.001***           |
| visit3 Month             | 0.986        | (0.89, 1.09)       | 0.79                 |
| visit6 Month             | 0.963        | (0.87, 1.07)       | 0.472                |
| visit12 Month            | 1.137        | (1.03, 1.26)       | 0.014*               |
| visit18 Month            | 1.090        | (0.98, 1.21)       | 0.11                 |
| visit24 Month            | 1.093        | (0.98, 1.22)       | 0.101                |
| <b>30% VAS Reduction</b> | <b>0.734</b> | <b>(0.7, 0.77)</b> | <b>&lt; 0.001***</b> |

(\*\*\*) < 0.001, (\*\*) < 0.01, (\*) < 0.05, (.) < 0.1

## Individual Holistic MCID domains versus VAS MCID

Each of the 4-item Holistic MCID domains were compared to VAS MCID alone. Stronger ad-hoc Pearson correlation were observed for the 4-item Holistic MCID, and LMM estimates indicated that 4-item Holistic MCID scores were anywhere from 50-100+% more quantitatively representative of HRQoL, physical function, emotional function, and sleep quality, than VAS MCID alone.

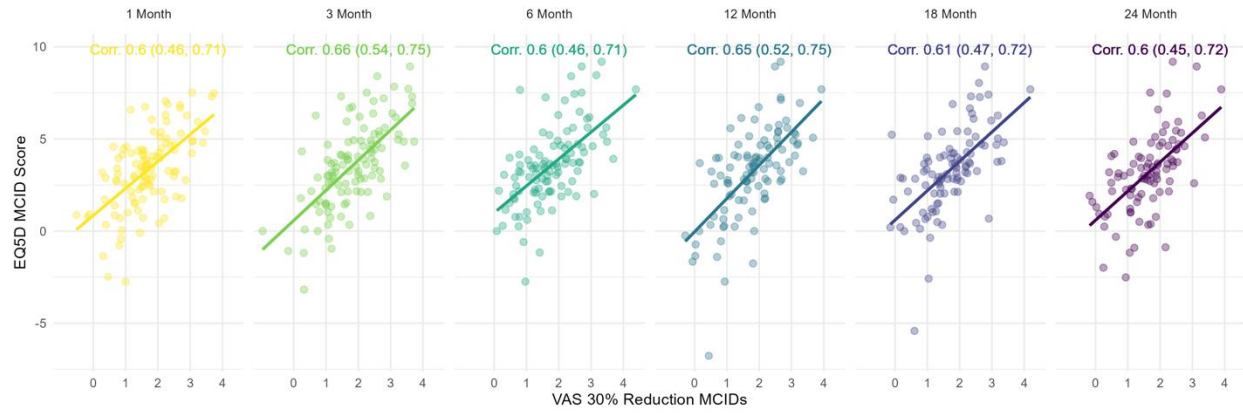

Figure S6. Association between VAS 30% reduction in pain intensity and EQ-5D MCID score

### SUPPLEMENTARY MATERIAL 3

Table S6. Eigenvalues and Variance Explained by PCA dimensions (Holistic MCID)

| Dimension   | Eigenvalue | Variance Percent | Cumulative Variance Percent |
|-------------|------------|------------------|-----------------------------|
| Dimension 1 | 2.95       | 58.98            | 58.98                       |
| Dimension 2 | 0.70       | 13.97            | 72.95                       |
| Dimension 3 | 0.59       | 11.84            | 84.79                       |
| Dimension 4 | 0.46       | 9.23             | 94.02                       |
| Dimension 5 | 0.30       | 5.98             | 100.00                      |

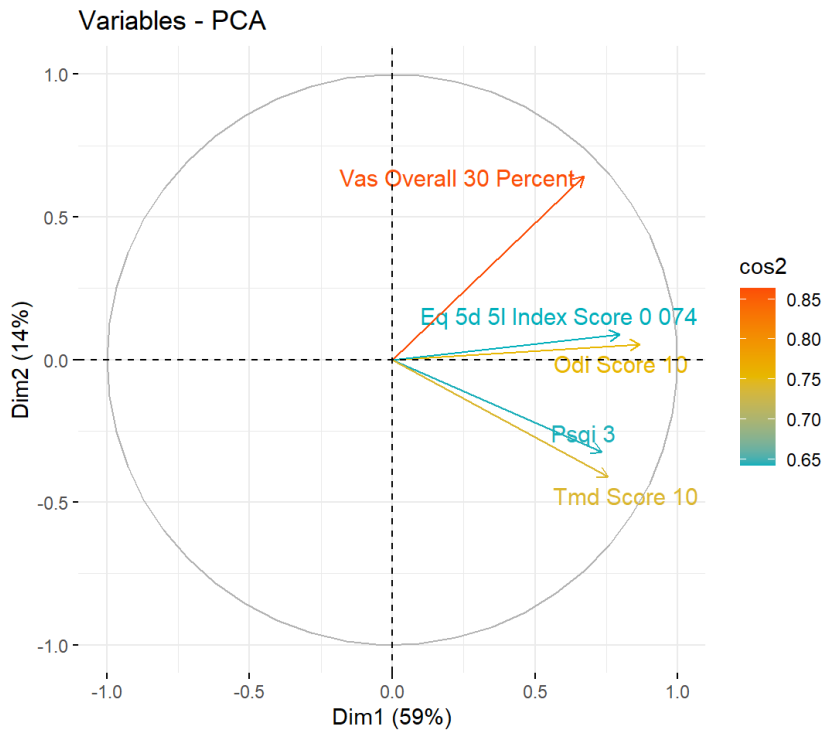

Figure S7. Relative contribution of each domain projected onto the first 2 PCA dimensions, with  $\cos^2$  distance showing relative magnitude or 'importance' of each domain

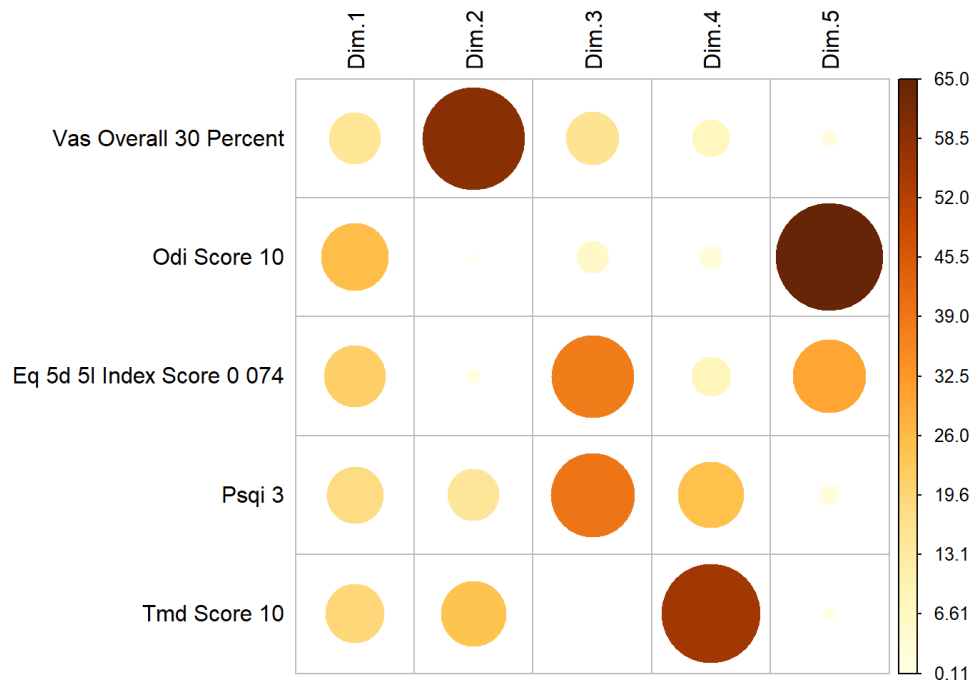

Figure S8. Correlation plot showing contribution of each domain to the PCA dimensions

Each of the 5 domains contributes roughly equally to the first dimension (i.e., same size circles), whereas only certain variables are the highest contributors to the remaining lower-variance explained dimensions.

Table S7. Comparison of intervention response on the Holistic MCID score versus the PGIC scale

| Ordinal-Logistic Mixed Effect Regression Results                |              |                     |                      |
|-----------------------------------------------------------------|--------------|---------------------|----------------------|
| Evidence of Significant Association between <b>HMCID</b> & PGIC |              |                     |                      |
| Coefficient                                                     | Odds Ratio   | 95% CI              | p-value              |
| Minimal improvement, No change, or Worse Much improved          | 4.314        | (1.61, 11.56)       | 0.004**              |
| Much improved Very much improved                                | 192.729      | (60.86, 610.01)     | < 0.001***           |
| visit3 Month                                                    | 1.316        | (0.68, 2.56)        | 0.419                |
| visit6 Month                                                    | 1.527        | (0.78, 2.98)        | 0.216                |
| visit12 Month                                                   | 1.230        | (0.62, 2.44)        | 0.555                |
| visit18 Month                                                   | 1.318        | (0.66, 2.63)        | 0.434                |
| visit24 Month                                                   | 1.484        | (0.74, 2.98)        | 0.267                |
| <b>Holistic MCID Score</b>                                      | <b>6.694</b> | <b>(4.62, 9.69)</b> | <b>&lt; 0.001***</b> |

(\*\*\*) < 0.001, (\*\*) < 0.01, (\*) < 0.05, (.) < 0.1



Table S8. Comparison of intervention response on the Holistic MCID score versus the EQ-VAS

100% Response-inflated Mixed-effect Beta Regression (Inverted Scale)

Evidence of Significant Association between **HMCID** & EQ5D VAS (0-100)

| Coefficient                | Odds Ratio   | 95% CI              | p-value              |
|----------------------------|--------------|---------------------|----------------------|
| (Intercept)                | 1.091        | (0.96, 1.24)        | 0.172                |
| visit3 Month               | 1.016        | (0.95, 1.09)        | 0.66                 |
| visit6 Month               | 0.966        | (0.9, 1.04)         | 0.332                |
| visit12 Month              | 1.094        | (1.02, 1.17)        | 0.011*               |
| visit18 Month              | 1.018        | (0.95, 1.09)        | 0.635                |
| visit24 Month              | 1.024        | (0.95, 1.1)         | 0.527                |
| <b>Holistic MCID Score</b> | <b>0.609</b> | <b>(0.59, 0.63)</b> | <b>&lt; 0.001***</b> |

(\*\*\*) < 0.001, (\*\*) < 0.01, (\*) < 0.05, (.) < 0.1

## SUPPLEMENTARY MATERIAL 4

Table S9. Comparison of 4-item Holistic MCID (minus EQ-5D) association with EQ-5D MCID

Linear Mixed Model Results for 4-Item No-EQ5D MCID score vs. EQ5D alone

Evidence of Significant Association between **No-EQ5D MCID** and EQ5D

| Coefficient                         | Estimate          | 95% CI              |
|-------------------------------------|-------------------|---------------------|
| (Intercept)                         | 0.88630971        | (0.45, 1.32)        |
| visit3 Month                        | 0.04256748        | (-0.22, 0.31)       |
| visit6 Month                        | 0.13006210        | (-0.14, 0.4)        |
| visit12 Month                       | -0.29190207       | (-0.56, -0.02)      |
| visit18 Month                       | -0.02302897       | (-0.3, 0.25)        |
| visit24 Month                       | -0.11397825       | (-0.39, 0.17)       |
| <b>4-Item No-EQ5D Holistic MCID</b> | <b>1.44098505</b> | <b>(1.27, 1.62)</b> |

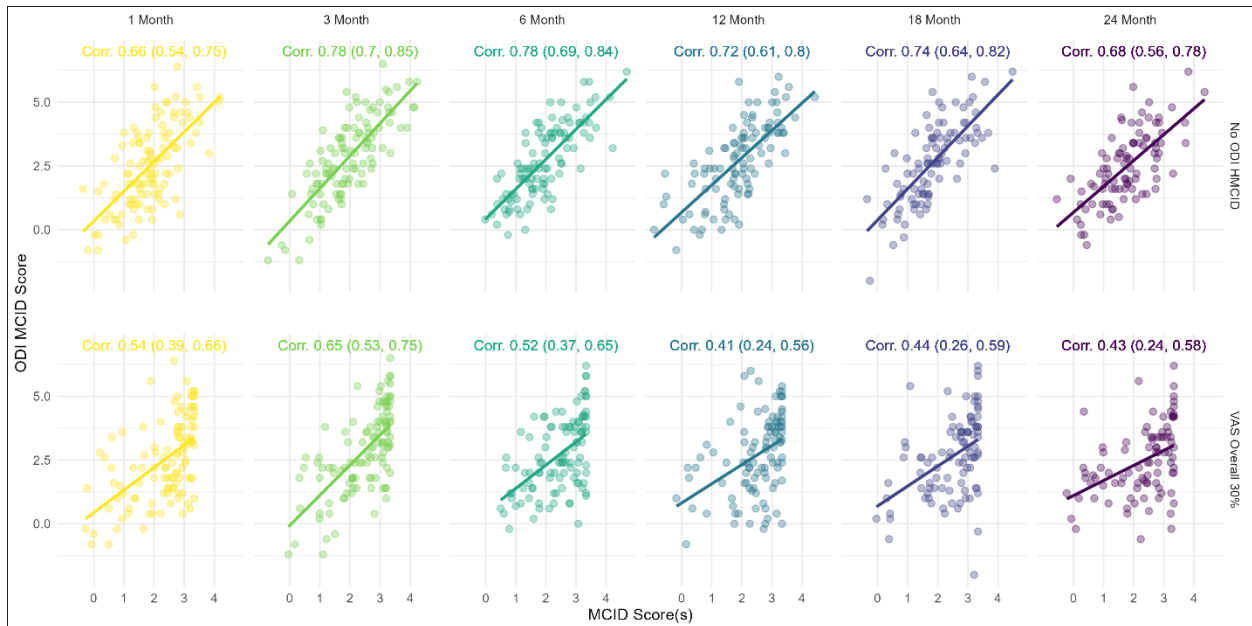

Figure S9. Significant correlations over time were observed between 4-Item HMCID (minus ODI) and ODI MCID score, and were much stronger than ODI MCID score association with VAS MCID alone

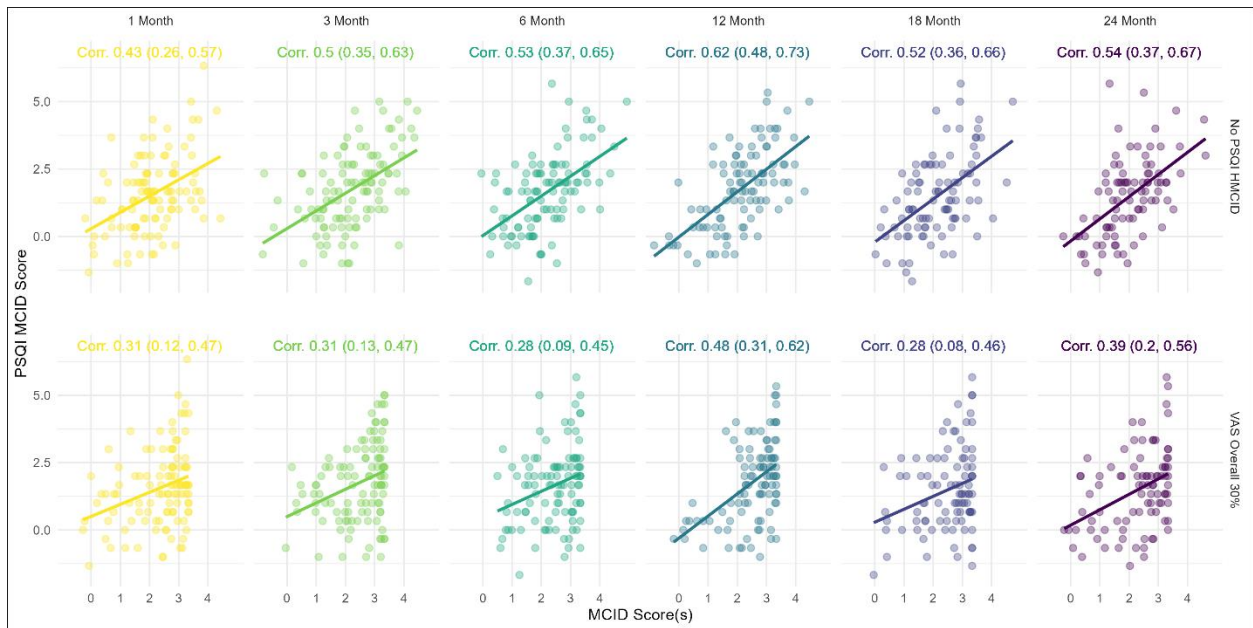

Figure S10. Significant correlations over time were observed between 4-Item HMCID (minus PSQI) and PSQI MCID score, and were much stronger than PSQI MCID score association with VAS MCID alone

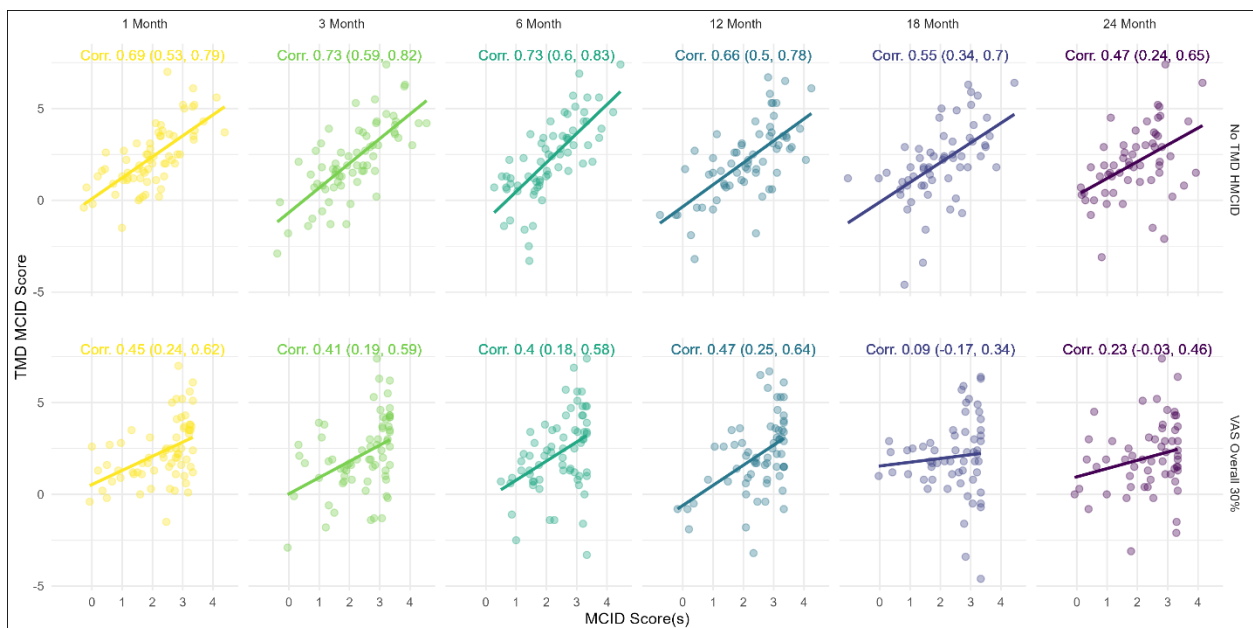

Figure S11. Significant correlations over time were observed between 4-Item HMCID (minus POMS) and POMS MCID score, and were much stronger than POMS MCID score association with VAS MCID alone
